# Supplementary material
Source: MDPI journal article supplement (https://www.mdpi.com/2072-4292/14/15/3736)
Supplement: s1 [file s1]

**Supplementary information for “Hierarchical Classification of Soybean in the Brazilian Savanna Based on Harmonized Landsat Sentinel Data” by Taya C. Parreiras (t234520@dac.unicamp.br) and co-authors.**

**Table S1.** Confusion matrices for Level 1 classifications with the three Landsat 8 OLI (L8) datasets: multispectral bands (MS), spectral vegetation indices (VIs), and combination of MS and VI (MS+VIs). AG = agricultural areas; NV = native vegetation; UA = users’ accuracy; PA = producers’ accuracy.

| L8 MS  |        |       |       |        | L8 VIs |       |       |       |        | L8 MS + VIs |        |       |       |        |
|--------|--------|-------|-------|--------|--------|-------|-------|-------|--------|-------------|--------|-------|-------|--------|
| Class  | AG     | NV    | Total | UA (%) | Class  | AG    | NV    | Total | UA (%) | Class       | AG     | NV    | Total | UA (%) |
| AG     | 46     | 6     | 52    | 88.46  | AG     | 43    | 2     | 45    | 95.55  | AG          | 46     | 4     | 50    | 92.00  |
| NV     | 0      | 45    | 45    | 100.00 | NV     | 3     | 49    | 52    | 94.23  | NV          | 0      | 47    | 47    | 100.00 |
| Total  | 46     | 51    | 97    |        | Total  | 46    | 51    | 97    |        | Total       | 46     | 51    | 97    |        |
| PA (%) | 100.00 | 88.23 |       |        | PA (%) | 93.48 | 96.08 |       |        | PA (%)      | 100.00 | 90.19 |       |        |

**Table S2.** Confusion matrices for Level 1 classifications with the three Harmonized Landsat Sentinel-2 (HLS) datasets: multispectral bands (MS), spectral vegetation indices (VIs), and combination of MS and VIs (MS+VIs). AG = agricultural areas; NV = native vegetation; UA = users’ accuracy; PA = producers’ accuracy.

| HLS MS |       |       |       |        | HLS VIs |      |       |       |        | HLS MS + VIs |       |       |       |        |
|--------|-------|-------|-------|--------|---------|------|-------|-------|--------|--------------|-------|-------|-------|--------|
| Class  | AG    | NV    | Total | UA (%) | Class   | AG   | NV    | Total | UA (%) | Class        | AG    | NV    | Total | UA (%) |
| AG     | 44    | 6     | 50    | 88.00  | AG      | 42   | 2     | 44    | 95.45  | AG           | 44    | 2     | 46    | 95.65  |
| NV     | 2     | 45    | 47    | 95.74  | NV      | 4    | 49    | 53    | 92.45  | NV           | 2     | 49    | 51    | 96.08  |
| Total  | 46    | 51    | 97    |        | Total   | 44   | 51    | 99    |        | Total        | 46    | 51    | 98    |        |
| PA (%) | 95.65 | 88.23 |       |        | PA (%)  | 91.3 | 96.08 |       |        | PA (%)       | 95.65 | 96.07 |       |        |

**Table S3.** Confusion matrices for Level 2 classifications with the three Landsat 8 OLI (L8) datasets: multispectral bands (MS), spectral vegetation indices (VIs), and combination of MS and VIs (MS+VIs). AC = annual crops; PC = perennial crops; PT = pasturelands; UA = users’ accuracy; PA = producers’ accuracy.

| L8 MS  |       |        |       |       |        | L8 VIs |       |        |       |       |        | L8 MS + VIs |       |        |       |       |        |
|--------|-------|--------|-------|-------|--------|--------|-------|--------|-------|-------|--------|-------------|-------|--------|-------|-------|--------|
| Class  | AC    | PC     | PT    | Total | UA (%) | Class  | AC    | PC     | PT    | Total | UA (%) | Class       | AC    | PC     | PT    | Total | UA (%) |
| AC     | 14    | 0      | 3     | 17    | 82.35  | AC     | 15    | 0      | 1     | 16    | 93.75  | AC          | 15    | 0      | 2     | 17    | 88.23  |
| PC     | 1     | 8      | 0     | 9     | 88.89  | PC     | 1     | 8      | 0     | 9     | 88.89  | PC          | 0     | 8      | 0     | 8     | 100.00 |
| PT     | 1     | 0      | 4     | 5     | 80.00  | PT     | 0     | 0      | 6     | 6     | 100.00 | PT          | 1     | 0      | 5     | 6     | 83.33  |
| Total  | 16    | 8      | 7     | 31    |        | Total  | 16    | 8      | 7     | 31    |        | Total       | 16    | 8      | 7     | 31    |        |
| PA (%) | 87.50 | 100.00 | 57.14 |       |        | PA (%) | 93.75 | 100.00 | 85.71 |       |        | PA (%)      | 93.75 | 100.00 | 71.43 |       |        |

**Table S4.** Confusion matrices for Level 2 classifications with the three Harmonized Landsat Sentinel-2 (HLS) datasets: multispectral bands (MS), spectral vegetation indices (VIs), and a combination of MS and VIs (MS+VIs). AC = annual crops; PC = perennial crops; PT = pasturelands; UA = users' accuracy; PA = producers' accuracy.

| HLS MS |       |      |       |       |        | HLS VIs |        |       |       |       |        | HLS MS + VIs |        |       |       |       |        |
|--------|-------|------|-------|-------|--------|---------|--------|-------|-------|-------|--------|--------------|--------|-------|-------|-------|--------|
| Class  | AC    | PC   | PT    | Total | UA (%) | Class   | AC     | PC    | PT    | Total | UA (%) | Class        | AC     | PC    | PT    | Total | UA (%) |
| AC     | 15    | 1    | 3     | 19    | 78.95  | AC      | 16     | 1     | 1     | 18    | 88.88  | AC           | 16     | 1     | 1     | 18    | 88.88  |
| PC     | 0     | 7    | 0     | 7     | 100.00 | PC      | 0      | 7     | 0     | 7     | 100.00 | PC           | 0      | 7     | 0     | 7     | 100.00 |
| PT     | 1     | 0    | 4     | 5     | 80.00  | PT      | 0      | 0     | 6     | 6     | 100.00 | PT           | 0      | 0     | 6     | 6     | 100.00 |
| Total  | 16    | 8    | 7     | 31    |        | Total   | 16     | 8     | 7     | 31    |        | Total        | 16     | 8     | 7     | 31    |        |
| PA (%) | 93.75 | 87.5 | 57.14 |       |        | PA (%)  | 100.00 | 87.50 | 85.71 |       |        | PA (%)       | 100.00 | 87.50 | 85.70 |       |        |

**Table S5.** Confusion matrices for Level 3 classifications with the three Landsat 8 OLI (L8) datasets: multispectral bands (MS), spectral vegetation indices (VIs), and combination of MS and VIs (MS+VIs). SB = soybean; OAC = other annual crops; UA = users' accuracy; PA = producers' accuracy.

| L8 MS  |       |       |       |        | L8 VIs |       |      |       |        | L8 MS + VIs |       |       |       |        |
|--------|-------|-------|-------|--------|--------|-------|------|-------|--------|-------------|-------|-------|-------|--------|
| Class  | SB    | OAC   | Total | UA (%) | Class  | SB    | OAC  | Total | UA (%) | Class       | SB    | OAC   | Total | UA (%) |
| SB     | 11    | 1     | 12    | 91.66  | SB     | 11    | 3    | 14    | 78.57  | SB          | 11    | 1     | 12    | 91.66  |
| OAC    | 4     | 7     | 11    | 63.64  | OAC    | 4     | 5    | 9     | 55.55  | OAC         | 4     | 7     | 11    | 63.63  |
| Total  | 15    | 8     | 23    |        | Total  | 15    | 8    | 23    |        | Total       | 15    | 8     | 23    |        |
| PA (%) | 73.33 | 87.50 |       |        | PA (%) | 73.33 | 62.5 |       |        | PA (%)      | 73.33 | 87.50 |       |        |

**Table S6.** Confusion matrices for Level 3 classifications with the three Harmonized Landsat Sentinel-2 (HLS) datasets: multispectral bands (MS), spectral vegetation indices (VIs), and a combination of MS and VIs (MS+VIs). SB = soybean; OAC = other annual crops; UA = users' accuracy; PA = producers' accuracy.

| HLS MS |       |       |       |        | HLS VIs |       |     |       |        | HLS MS + VIs |       |       |       |        |
|--------|-------|-------|-------|--------|---------|-------|-----|-------|--------|--------------|-------|-------|-------|--------|
| Class  | SB    | OAC   | Total | UA (%) | Class   | SB    | OAC | Total | UA (%) | Class        | SB    | OAC   | Total | UA (%) |
| SB     | 13    | 1     | 14    | 92.85  | SB      | 14    | 2   | 16    | 87.50  | SB           | 14    | 1     | 15    | 93.33  |
| OAC    | 2     | 7     | 9     | 77.78  | OAC     | 1     | 6   | 7     | 85.71  | OAC          | 1     | 7     | 8     | 87.50  |
| Total  | 15    | 8     | 23    |        | Total   | 15    | 8   | 23    |        | Total        | 15    | 8     | 23    |        |
| PA (%) | 86.66 | 86.95 |       |        | PA (%)  | 93.33 | 75  |       |        | PA (%)       | 93.33 | 87.50 |       |        |

**Table S7.** Confusion matrix for Level 1 classifications with the three Sentinel-2 Multi-spectral Instrument Surface Reflectance (HLSS30) datasets: multispectral bands (MS), spectral vegetation indices (VIs), and combination of MS and VIs (MS+VIs). AG = agricultural areas; NV = native vegetation; UA = users' accuracy; PA = producers' accuracy.

| HLSS30 MS |    |    |       |        | HLSS30 VIs |    |    |       |        | HLSS30 MS + VIs |    |    |       |        |
|-----------|----|----|-------|--------|------------|----|----|-------|--------|-----------------|----|----|-------|--------|
| Class     | AG | NV | Total | UA (%) | Class      | AG | NV | Total | UA (%) | Class           | AG | NV | Total | UA (%) |
| AG        | 42 | 3  | 45    | 93.33  | AG         | 44 | 3  | 47    | 93.62  | AG              | 45 | 3  | 48    | 93.75  |
| NV        | 4  | 48 | 52    | 92.31  | NV         | 2  | 48 | 50    | 96.00  | NV              | 1  | 48 | 49    | 97.96  |

|        |       |       |    |        |       |       |    |        |       |       |    |
|--------|-------|-------|----|--------|-------|-------|----|--------|-------|-------|----|
| Total  | 46    | 51    | 97 | Total  | 46    | 51    | 97 | Total  | 46    | 51    | 97 |
| PA (%) | 91.30 | 94.12 |    | PA (%) | 95.65 | 94.12 |    | PA (%) | 97.83 | 94.11 |    |

**Table S8.** Confusion matrix for Level 2 classifications with the three Sentinel-2 Multi-spectral Instrument Surface Reflectance (HLSS30) datasets: multispectral bands (MS), spectral vegetation indices (VIs), and combination of MS and VIs (MS+VIs). AC = annual crops; PC = perennial crops; PT = pasturelands; UA = users' accuracy; PA = producers' accuracy.

| HLSS30 MS |    |    |    |       |        | HLSS30 VIs |       |       |       |       |        | HLSS30 MS + VIs |       |       |        |       |        |
|-----------|----|----|----|-------|--------|------------|-------|-------|-------|-------|--------|-----------------|-------|-------|--------|-------|--------|
| Class     | AC | PC | PT | Total | UA (%) | Class      | AC    | PC    | PT    | Total | UA (%) | Class           | AC    | PC    | PT     | Total | UA (%) |
| AC        | 15 | 0  | 2  | 17    | 88.23  | AC         | 13    | 0     | 1     | 14    | 92.86  | AC              | 13    | 0     | 0      | 13    | 100.00 |
| PC        | 0  | 7  | 0  | 7     | 100.00 | PC         | 0     | 7     | 0     | 7     | 100.00 | PC              | 0     | 7     | 0      | 7     | 100.00 |
| PT        | 1  | 1  | 5  | 7     | 71.43  | PT         | 3     | 1     | 6     | 10    | 60.00  | PT              | 3     | 1     | 7      | 11    | 63.64  |
| Total     | 16 | 8  | 7  | 31    |        | Total      | 16    | 8     | 7     | 31    |        | Total           | 16    | 8     | 7      | 31    |        |
| PA (%)    |    |    |    |       |        | PA (%)     | 81.25 | 87.50 | 85.71 |       |        | PA (%)          | 81.25 | 87.50 | 100.00 |       |        |

**Table S9.** Confusion matrix for Level 3 classifications with the three Sentinel-2 Multi-spectral Instrument Surface Reflectance (HLSS30) datasets: multispectral bands (MS), spectral vegetation indices (VIs), and a combination of MS and VIs (MS+VIs). SB = soybean; OAC = other annual crops; UA = users' accuracy; PA = producers' accuracy.

| HLSS30 MS |       |       |       |        | HLSS30 VIs |       |       |       |        | HLSS30 + MS + VIs |       |       |       |        |
|-----------|-------|-------|-------|--------|------------|-------|-------|-------|--------|-------------------|-------|-------|-------|--------|
| Class     | SB    | OAC   | Total | UA (%) | Class      | SB    | OAC   | Total | UA (%) | Class             | SB    | OAC   | Total | UA (%) |
| SB        | 13    | 1     | 14    | 92.85  | SB         | 14    | 4     | 18    | 77.78  | SB                | 14    | 2     | 16    | 87.50  |
| OAC       | 2     | 7     | 9     | 77.77  | OAC        | 1     | 4     | 5     | 80.00  | OAC               | 1     | 6     | 7     | 85.71  |
| Total     | 15    | 8     | 23    |        | Total      | 15    | 8     | 23    |        | Total             | 15    | 8     | 23    |        |
| PA (%)    | 86.67 | 87.50 |       |        | PA (%)     | 93.33 | 50.00 |       |        | PA (%)            | 93.33 | 75.00 |       |        |

**Table S10.** Confusion matrix for Level 1 classifications with the three Landsat Operational Land Imager Surface Reflectance and TOA Brightness (HLSL30) datasets: multispectral bands (MS), spectral vegetation indices (VIs), and combination of MS and VIs (MS+VIs). AG = agricultural areas; NV = native vegetation; UA = users' accuracy; PA = producers' accuracy.

| HLSL30 MS |       |       |       |        | HLSL30 VIs |       |       |       |        | HLSL30 MS + VIs |       |       |       |        |
|-----------|-------|-------|-------|--------|------------|-------|-------|-------|--------|-----------------|-------|-------|-------|--------|
| Class     | AG    | NV    | Total | UA (%) | Class      | AG    | NV    | Total | UA (%) | Class           | AG    | NV    | Total | UA (%) |
| AG        | 43    | 7     | 50    | 86.00  | AG         | 37    | 6     | 43    | 86.04  | AG              | 35    | 3     | 38    | 92.10  |
| NV        | 3     | 44    | 47    | 93.62  | NV         | 9     | 45    | 54    | 83.33  | NV              | 11    | 48    | 59    | 81.35  |
| Total     | 46    | 51    | 97    |        | Total      | 46    | 51    | 97    |        | Total           | 46    | 51    | 97    |        |
| PA (%)    | 93.48 | 86.27 |       |        | PA (%)     | 80.43 | 88.23 |       |        | PA (%)          | 76.09 | 94.12 |       |        |

**Table S11** Confusion matrix for Level 2 classifications with the three Landsat Operational Land Imager Surface Reflectance and TOA Brightness (HLSL30) datasets: multispectral bands (MS), spectral vegetation indices (VIs), and combination of MS and VIs (MS+VIs). AC = annual crops; PC = perennial crops; PT = pasturelands; UA = users' accuracy; PA = producers' accuracy.

| HLSL30 MS |       |       |       |       |        | HLSL30 VIs |       |       |       |       |        | HLSL30 MS + VIs |       |       |       |       |        |
|-----------|-------|-------|-------|-------|--------|------------|-------|-------|-------|-------|--------|-----------------|-------|-------|-------|-------|--------|
| Class     | AC    | PC    | PT    | Total | UA (%) | Class      | AC    | PC    | PT    | Total | UA (%) | Class           | AC    | PC    | PT    | Total | UA (%) |
| AC        | 13    | 1     | 4     | 18    | 72.22  | AC         | 14    | 0     | 4     | 18    | 77.78  | AC              | 14    | 0     | 4     | 18    | 77.78  |
| PC        | 1     | 7     | 0     | 8     | 87.50  | PC         | 1     | 7     | 0     | 8     | 87.50  | PC              | 1     | 7     | 0     | 8     | 87.50  |
| PT        | 2     | 0     | 3     | 5     | 60.00  | PT         | 1     | 1     | 3     | 5     | 60.00  | PT              | 1     | 1     | 3     | 5     | 60.00  |
| Total     | 16    | 8     | 7     | 31    |        | Total      | 16    | 8     | 7     | 31    |        | Total           | 16    | 8     | 7     | 31    |        |
| PA (%)    | 81.25 | 87.50 | 42.86 |       |        | PA (%)     | 87.50 | 87.50 | 42.86 |       |        | PA (%)          | 87.50 | 87.50 | 42.86 |       |        |

**Table S12.** Confusion matrix for Level 3 classifications with the three Landsat Operational Land Imager Surface Reflectance and TOA Brightness (HLSL30) datasets: multispectral bands (MS), spectral vegetation indices (VIs), and combination of MS and VIs (MS+VIs). SB = soybean; OAC = other annual crops; UA = users' accuracy; PT = producers' accuracy.

| HLSL30 MS |       |       |       |        | HLSL30 VIs |       |       |       |        | HLSL30 + MS + VIs |       |       |       |        |
|-----------|-------|-------|-------|--------|------------|-------|-------|-------|--------|-------------------|-------|-------|-------|--------|
| Class     | SB    | OAC   | Total | UA (%) | Class      | SB    | OAC   | Total | UA (%) | Class             | SB    | OAC   | Total | UA (%) |
| SB        | 9     | 1     | 10    | 90.00  | SB         | 12    | 3     | 15    | 80.00  | SB                | 10    | 1     | 11    | 90.91  |
| OAC       | 6     | 7     | 13    | 53.85  | OAC        | 3     | 5     | 8     | 62.50  | OAC               | 5     | 7     | 12    | 58.33  |
| Total     | 15    | 8     | 23    |        | Total      | 15    | 8     | 23    |        | Total             | 15    | 8     | 23    |        |
| PA (%)    | 60.00 | 87.50 |       |        | PA (%)     | 80.00 | 62.50 |       |        | PA (%)            | 66.67 | 87.50 |       |        |

**Table S13.** Results of the Students' *t*-test showing the level of significance of HLS datasets performances *versus* the HLS30, HL30, and L8 datasets in a 95% confidence interval.

| Level   | Dataset | Overall Accuracy |                 | Kappa           |                 |
|---------|---------|------------------|-----------------|-----------------|-----------------|
|         |         | <i>t</i> -Value  | <i>p</i> -Value | <i>t</i> -Value | <i>p</i> -Value |
| Level 1 | HLSS30  | -62.402          | 1               | -29.753         | 1               |
|         | HL30    | -43.445          | 0.000001667 *   | -18.237         | 0.0000493 *     |
|         | L8      | -69.954          | 1               | -33.887         | 1               |
| Level 2 | HLSS30  | -24.044          | 0.99            | -13.478         | 0.99            |
|         | HL30    | -20.518          | 0.0002118 *     | -7.4076         | 0.003981 *      |
|         | L8      | -26.607          | 0.99            | -11.294         | 0.99            |
| Level 3 | HLSS30  | -25.849          | 0.00005546 *    | -7.398          | 0.003887 *      |
|         | HL30    | -34.509          | 0.00000219 *    | -11.296         | 0.0003345 *     |
|         | L8      | -23.077          | 0.00008019 *    | -6.3461         | 0.004798 *      |

\* significant at  $p < 0.05$ .

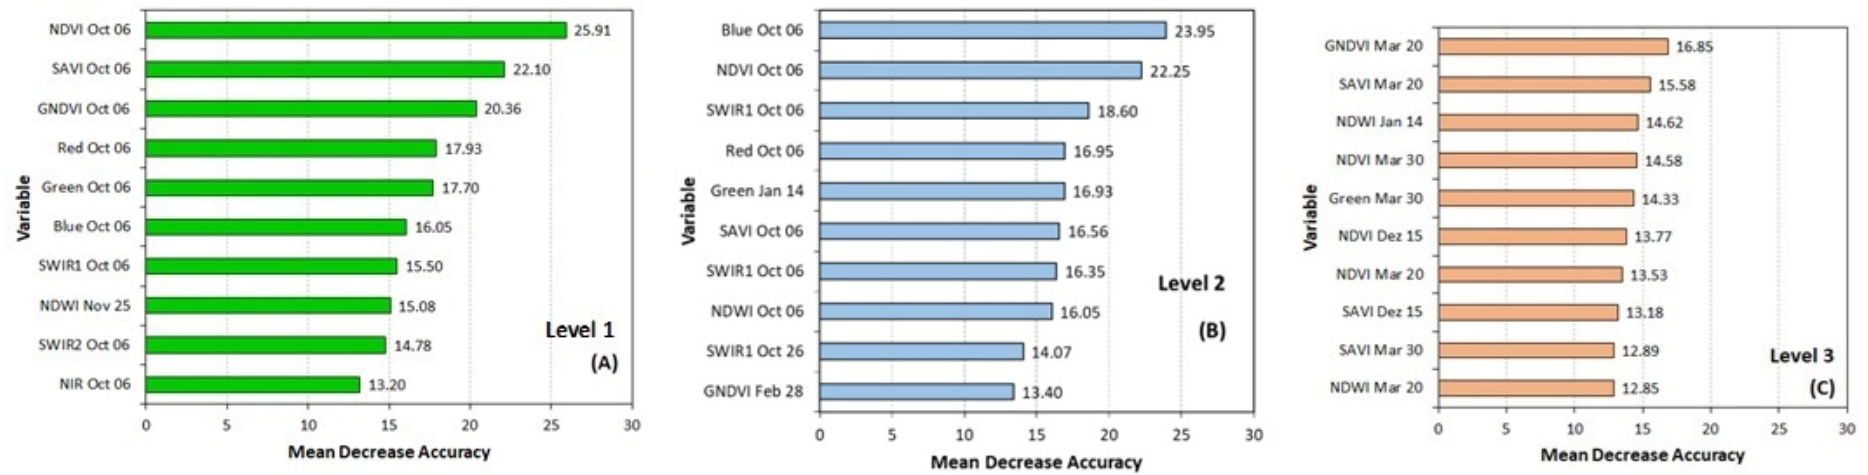

**Figure S1.** Measures of the importance of the Random Forest top 10 predictor variables for Level 1 (A), Level 2 (B), and Level 3 (C) hierarchical classifications based on the Sentinel-2 Multi-spectral Instrument Surface Reflectance (HLSS30) datasets. The months' names are abbreviated as Oct (October), Nov (November), Feb (February), Mar (March), and Jan (January).

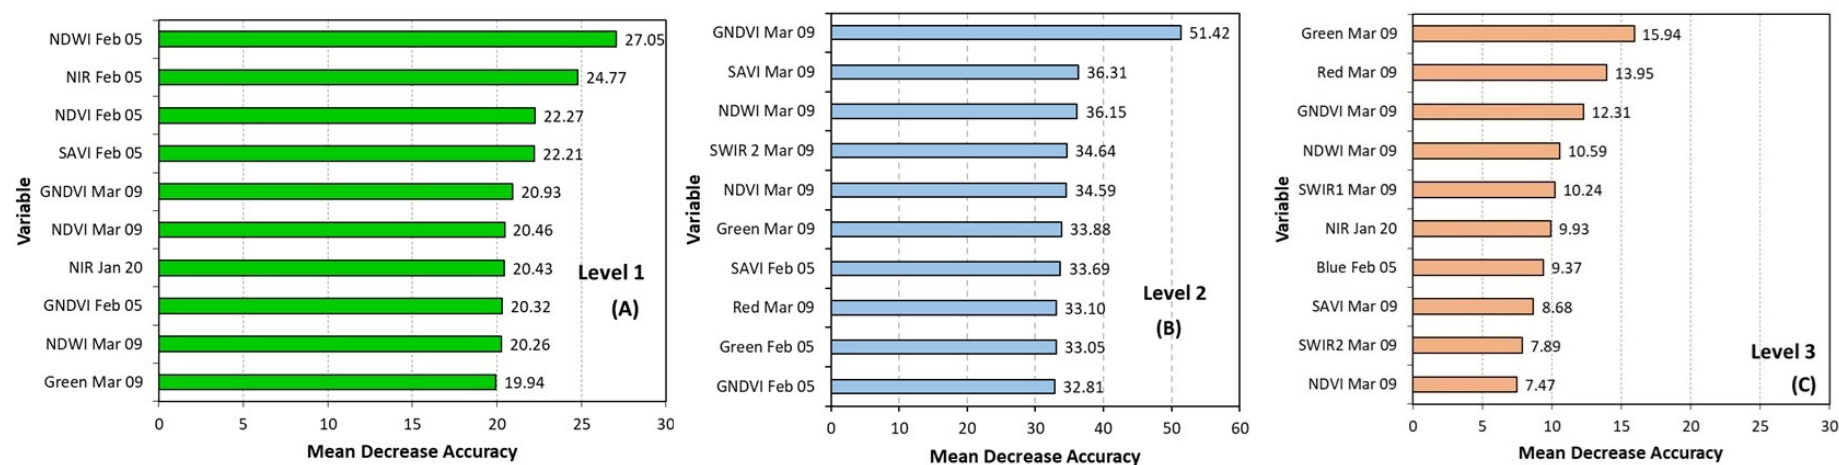

**Figure S2.** Measures of the importance of the Random Forest top 10 predictor variables for Level 1 (A), Level 2 (B), and Level 3 (C) hierarchical classifications based on the Landsat Operational Land Imager Surface Reflectance and TOA Brightness (HLSL30) datasets. The months' names are abbreviated as Oct (October), Nov (November), Feb (February), Mar (March), and Jan (January).

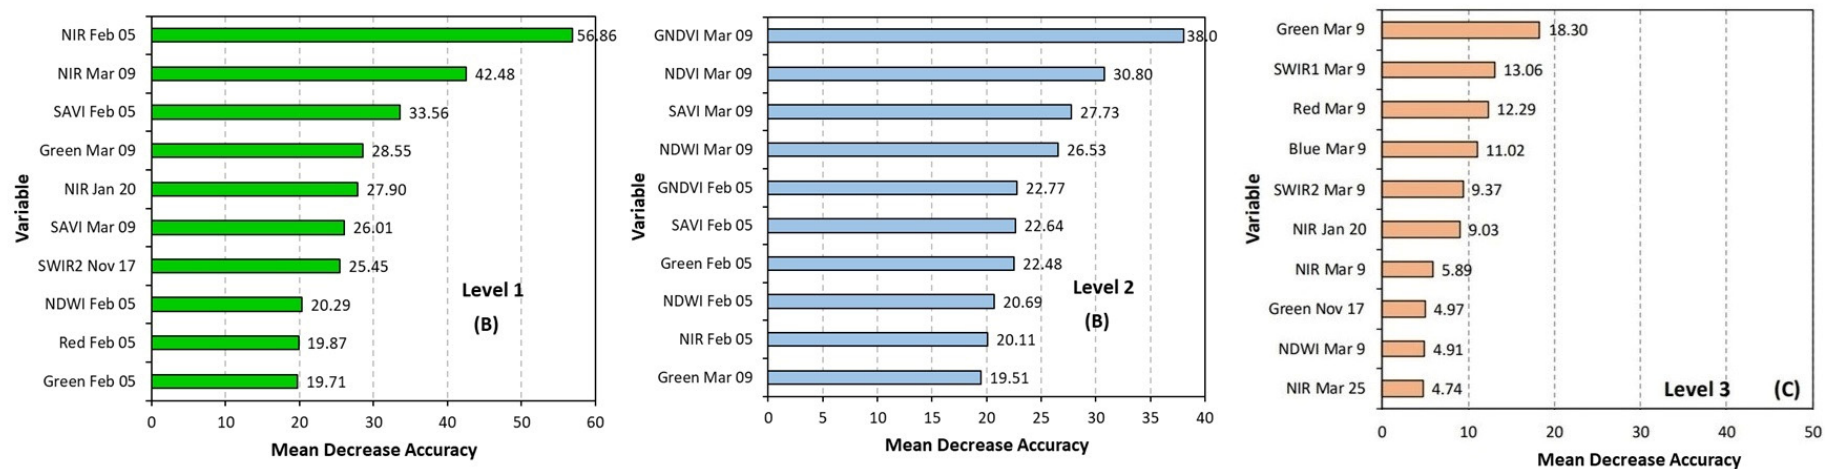

**Figure S3.** Measures of the importance of the Random Forest top 10 predictor variables for Level 1 (A), Level 2 (B), and Level 3 (C) hierarchical classifications based on the Landsat 8 Operational Land Imager (L8) datasets. The months' names are abbreviated as Oct (October), Nov (November), Feb (February), Mar (March), and Jan (January).
